# Supplementary material for: Death burden of high systolic blood pressure in Sichuan Southwest China 1990–2030
Source: Springer Nature journal article supplement (doi:10.1186/s12889-020-8377-6), 2020-03-29
Supplement: MOESM2 [file 17841556]

Death rate of CVD for people aged 30–69(per 100,000)

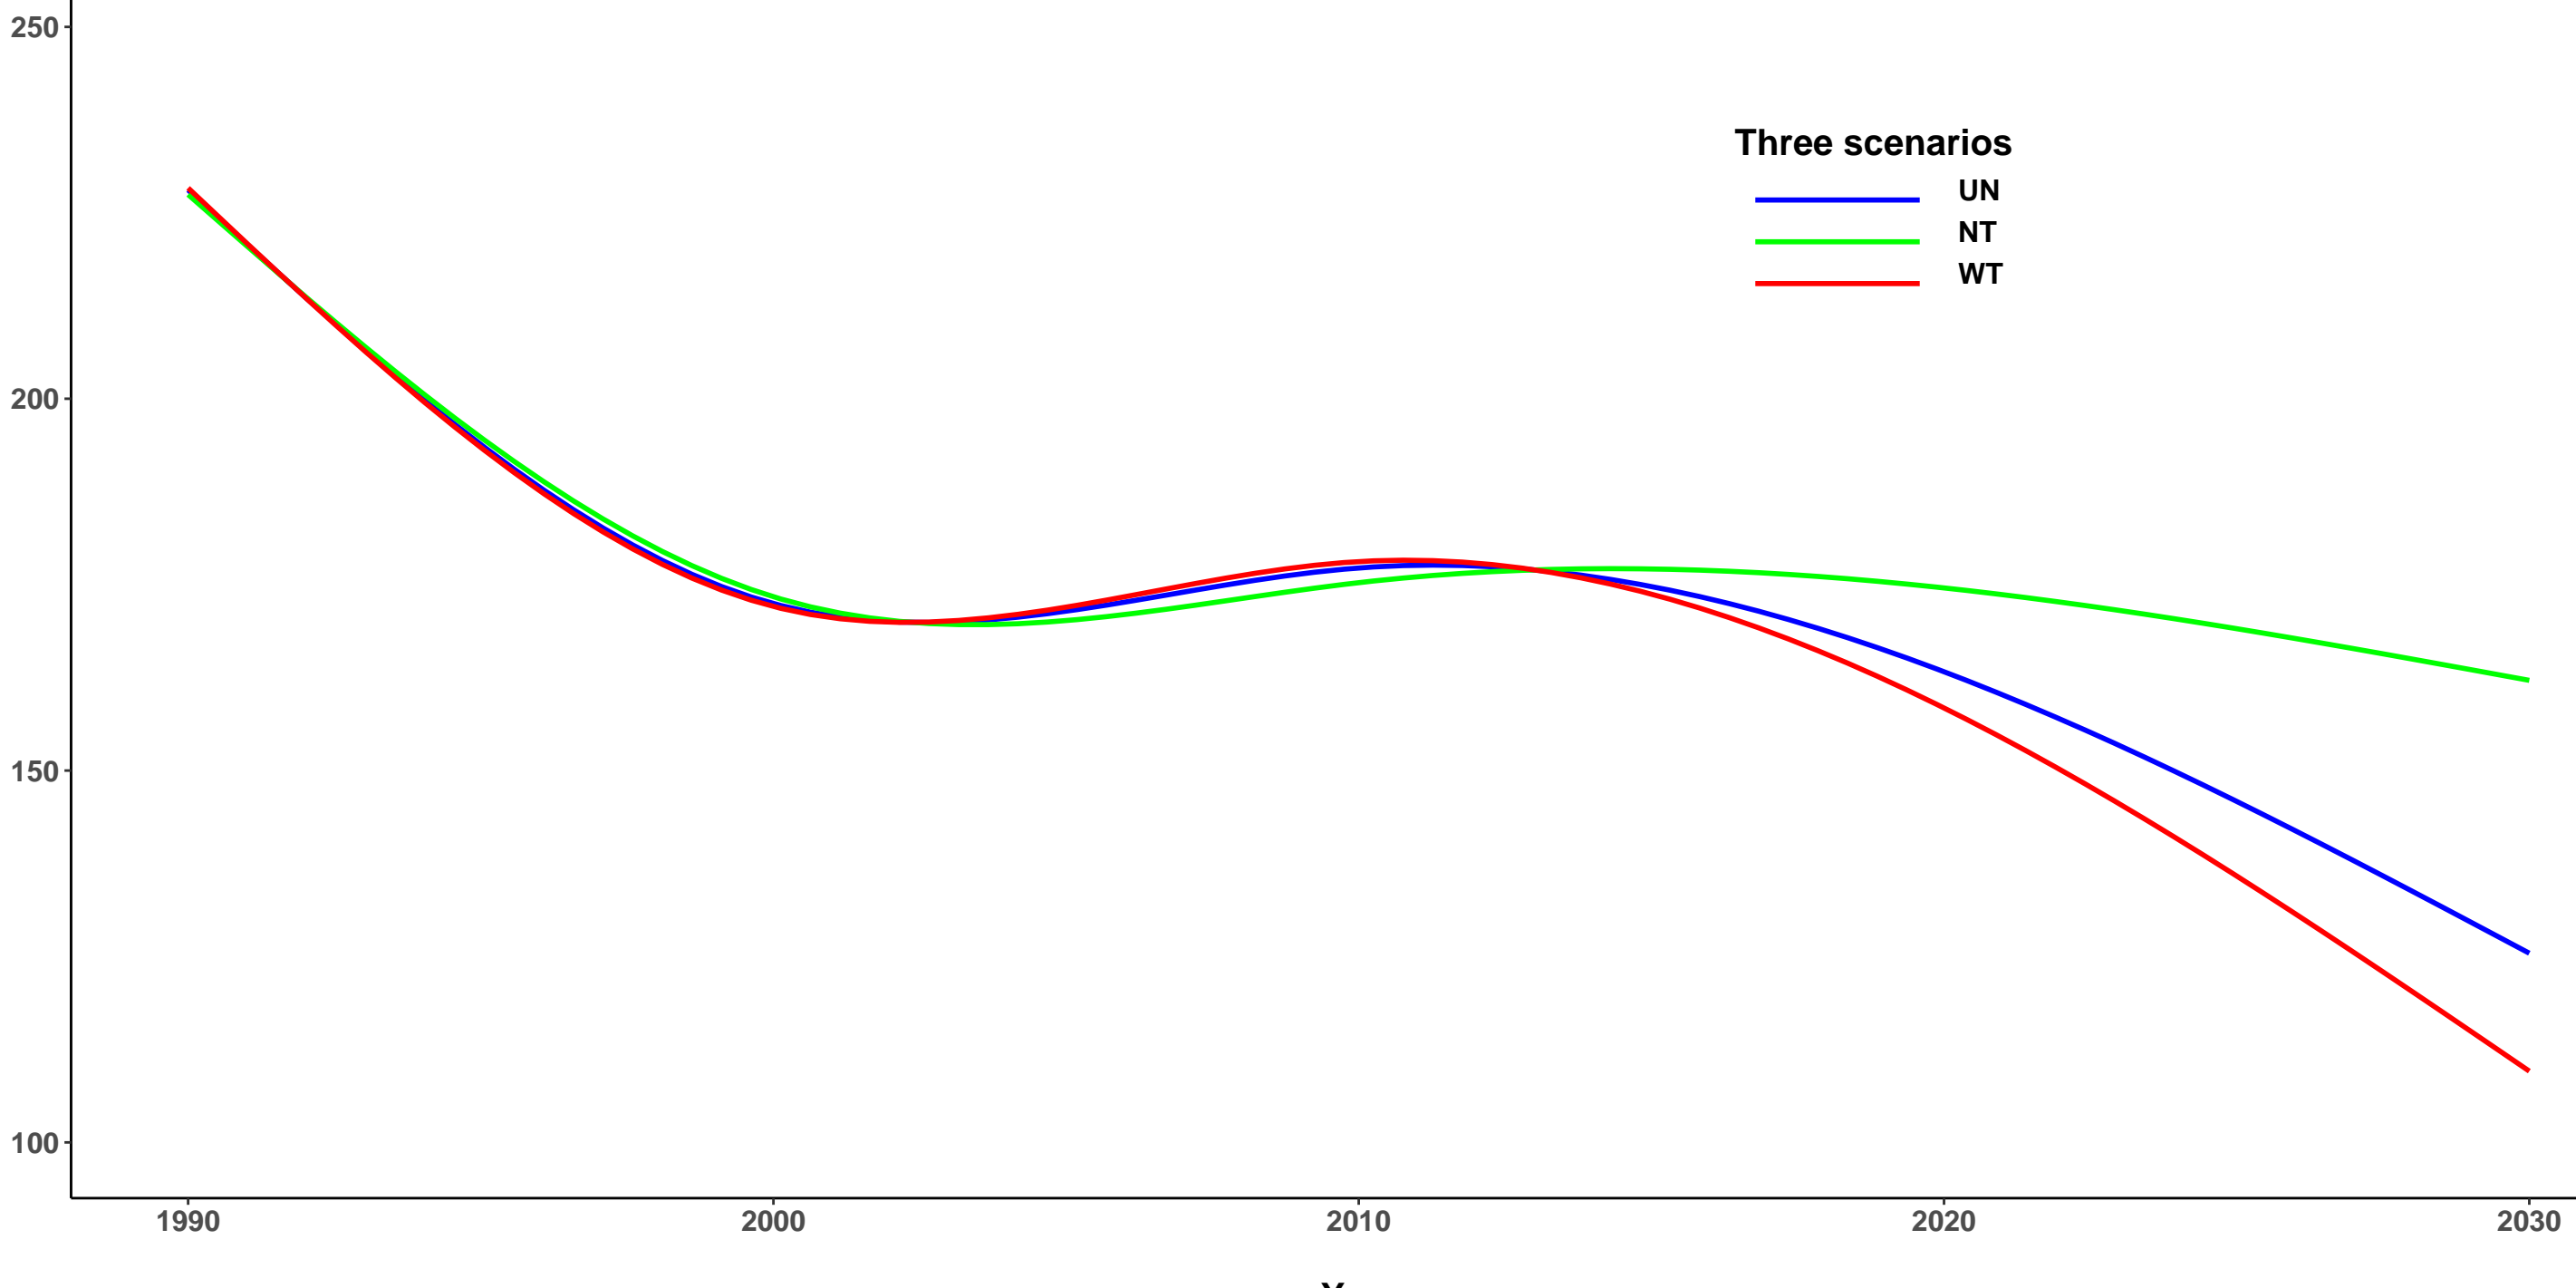

Three scenarios

- UN
- NT
- WT
